# Supplementary material for: CD4+ and CD8a+ PET imaging predicts response to novel PD-1 checkpoint inhibitor: studies of Sym021 in syngeneic mouse cancer models
Source: PubMed Central journal article supplement (PMC6857046; doi:10.7150/thno.37513), 2019-10-18
Supplement: thnov09p8221s1.pdf [file thnov09p8221s1.pdf]

## Supplementary

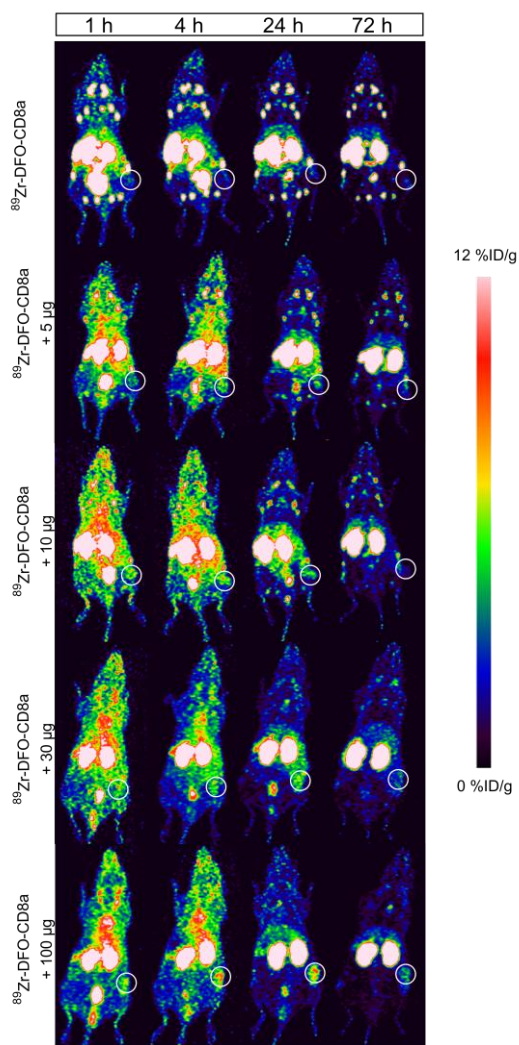

**Figure S1: Optimization of dose and imaging time-point in CT26 tumor-bearing mice.** Representative coronal maximum intensity projection (MIP) PET images of mice with CT26 tumors injected with  $^{89}\text{Zr}$ -DFO-CD8a and 0, 5, 10, 30 or 100  $\mu\text{g}$  CD8a-F(ab) $'$ 2. PET images were obtained 1, 4, 24 and 72 hours post-injection. Co-injection with CD8a-F(ab) $'$ 2 decreased the accumulation in lymphoid organs and increased the accumulation in tumor with increasing dose. Highest target-to-background uptake was observed with 30  $\mu\text{g}$  co-injection 24 hours post-injection and was chosen as optimal imaging parameters. The PET acquisition time was 300 seconds. White circles designate the tumor. %ID/g: % injected dose per gram tissue.

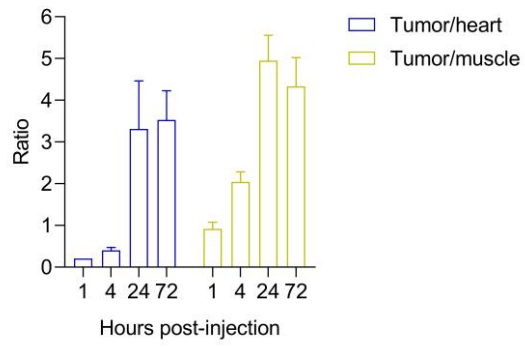

**Figure S2: PET based tumor-to-background ratios in CT26 tumor-bearing mice.** Tumor-to-heart and tumor-to-muscle ratios at the 1, 4, 24 and 72 hour time-point with 30  $\mu\text{g}$  co-dose based on the mean PET tumor uptake of  $^{89}\text{Zr}$ -DFO-CD8a (%ID/g) (N=3). No increase in image contrast was observed beyond 24 hours. Data are presented as mean  $\pm$  SEM.

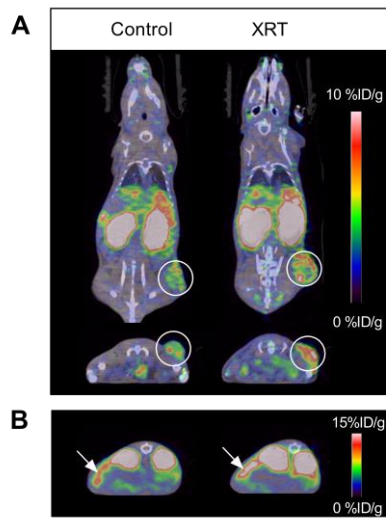

**Figure S3: Effect of external radiation therapy on  $^{89}\text{Zr}$ -DFO-CD8a uptake in CT26 tumor-bearing mice.** Representative PET/CT images of the (A) tumor and (B) spleen of a control and a fractionated external radiation therapy (3x2Gy) treated CT26 tumor-bearing mouse 24 hours post-injection of  $^{89}\text{Zr}$ -DFO-CD8a. The PET acquisition time was 300 seconds. White circles designate the tumor and white arrows designate the spleen. XRT: external radiation therapy; %ID/g: % injected dose per gram tissue.

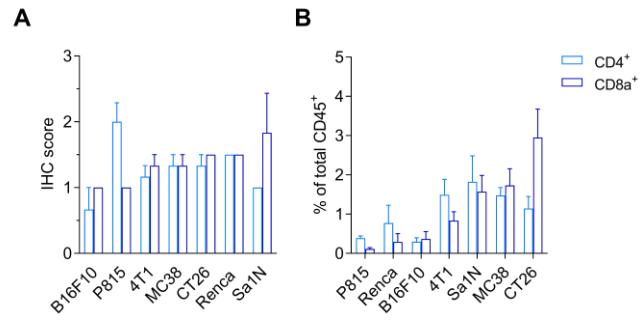

**Figure S4: CD4<sup>+</sup> and CD8<sup>+</sup> subsets in syngeneic mouse models quantified by *ex vivo* methods.** (A) Immunohistochemical (IHC) score of CD4<sup>+</sup> and CD8a<sup>+</sup> in cryosections of syngeneic tumor models (N=3/model). (B) Flow cytometric analysis of CD4<sup>+</sup> and CD8a<sup>+</sup> populations expressed as percentage of CD45<sup>+</sup> (N=6/model). Data are presented as mean  $\pm$  SEM.

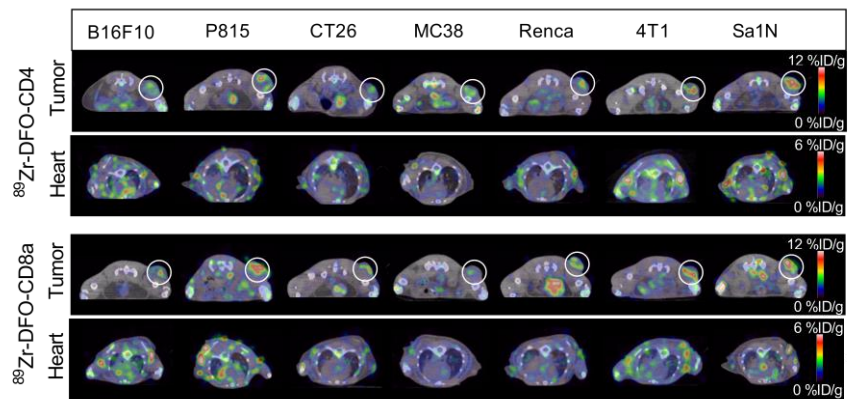

**Figure S5: Representative axial PET/CT images of syngeneic tumor models.** Representative PET/CT images of the tumor and heart of mice injected with  $^{89}\text{Zr}$ -DFO-CD4 (top panel) or  $^{89}\text{Zr}$ -DFO-CD8a (bottom panel) for each model. The PET acquisition time was 300 seconds. White circles designate the tumor. %ID/g: % injected dose per gram tissue.

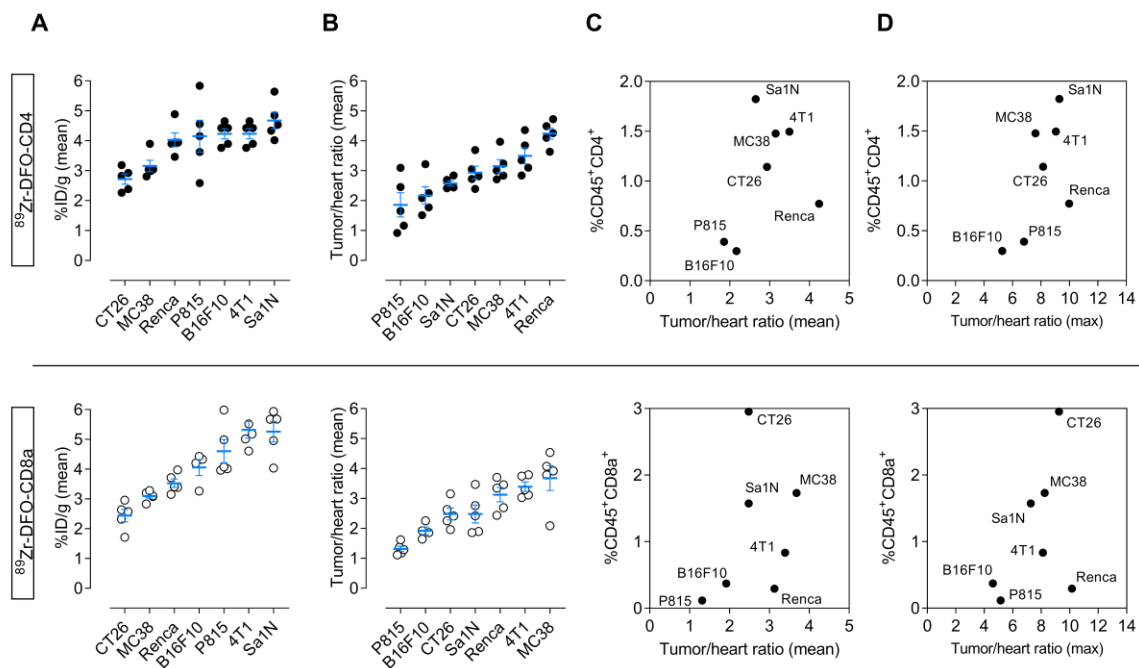

**Figure S6: PET tumor uptake of  $^{89}\text{Zr}$ -DFO-CD4 and  $^{89}\text{Zr}$ -DFO-CD8a in syngeneic mouse models.** (A) Mean  $^{89}\text{Zr}$ -DFO-CD4 (top panel) and  $^{89}\text{Zr}$ -DFO-CD8a (bottom panel) tumor uptake quantified from PET ROI analysis and expressed as %ID/g 24 hours post-injection of tracer in syngeneic mouse models ranked from low (left) to high (right). (B) Tumor-to-heart ratios based on the mean  $^{89}\text{Zr}$ -DFO-CD4 (top panel) and  $^{89}\text{Zr}$ -DFO-CD8a (bottom panel) uptake quantified from PET ROI analysis and expressed as %ID/g 24 hours post-injection of tracer ranked from low (left) to high (right). (C) Tumor-to-heart ratios based on the mean  $^{89}\text{Zr}$ -DFO-CD4 (top panel) and  $^{89}\text{Zr}$ -DFO-CD8a (bottom panel) uptake plotted against the average number of %CD45<sup>+</sup>CD4<sup>+</sup> and %CD45<sup>+</sup>CD8a<sup>+</sup> expressing cells, respectively, analyzed by flow cytometry. (D) Tumor-to-heart ratios based on the maximum  $^{89}\text{Zr}$ -DFO-CD4 (top panel) and  $^{89}\text{Zr}$ -DFO-CD8a (bottom panel) uptake plotted against the average number of %CD45<sup>+</sup>CD4<sup>+</sup> and %CD45<sup>+</sup>CD8a<sup>+</sup> expressing cells, respectively, analyzed by flow cytometry. Data are presented as mean  $\pm$  SEM. %ID/g: % injected dose per gram tissue.

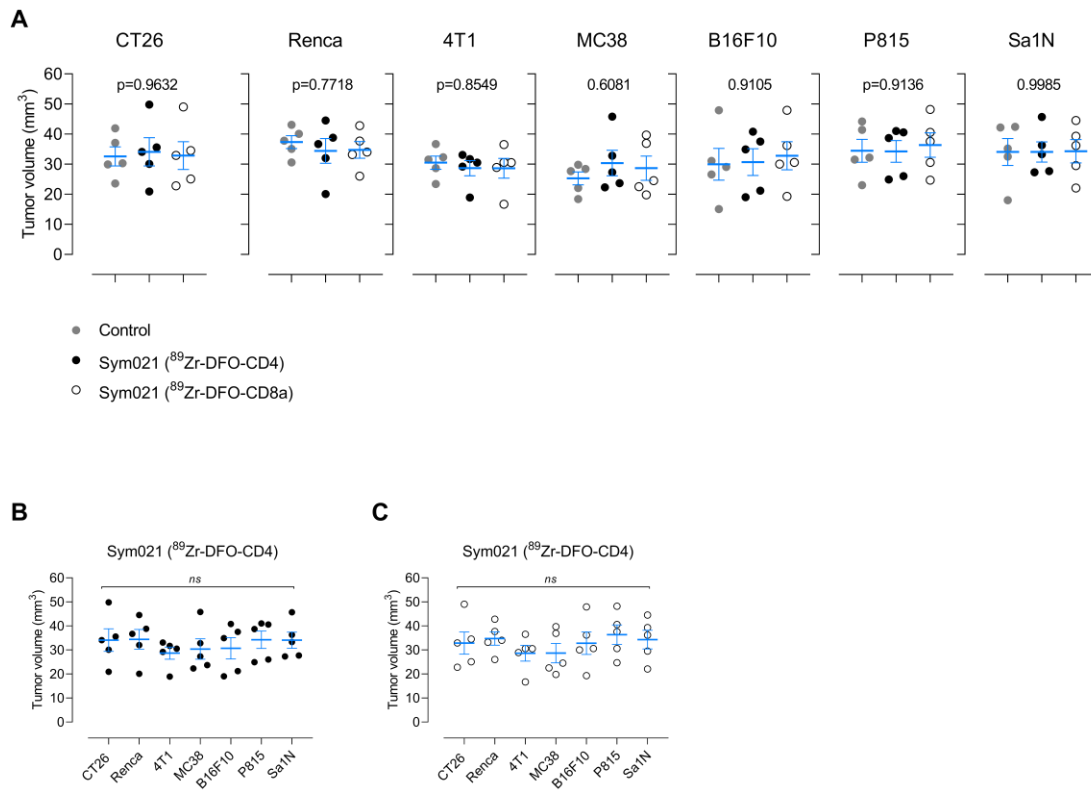

**Figure S7: Tumor volumes of study groups at day of randomization.** (A) Groups within each tumor model had equal tumor volume at the day of randomization (day -1 relative to start of therapy) (N=5/group). (B) All mice in the Sym021 ( $^{89}\text{Zr-DFO-CD4}$ ) group had equal tumor volumes across models (N=5/model). (C) All mice in the Sym021 ( $^{89}\text{Zr-DFO-CD8a}$ ) group had equal tumor volumes across models (N=5/model). Data are presented as mean  $\pm$  SEM. *ns*: no significance.

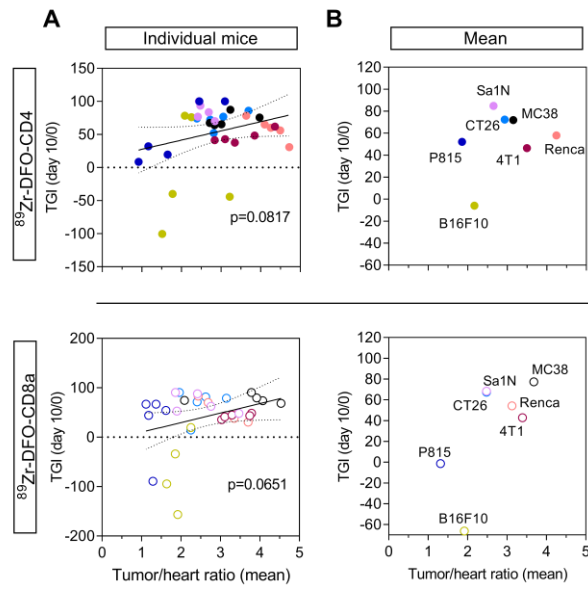

**Figure S8:** The tumor growth inhibition (TGI) from day 0 to day 10 in Sym021 (10 mg/kg) treated mice relative to the growth of the control group plotted against the mean  $^{89}\text{Zr-DFO-CD4}$  (top panel) and  $^{89}\text{Zr-DFO-CD8a}$  (bottom panel) tumor-to-heart ratio in (A) individual mice and (B) as a mean of all tumor models (N=35/tracer, N=5/model). Data are presented as mean  $\pm$  SEM.



**Table S1:** Tumor uptake and tumor-to-background ratios with increasing dose in CT26 tumor-bearing mice 72 hours post-injection of <sup>89</sup>Zr-DFO-CD8a (N=3/dose).

|          | <sup>89</sup> Zr-DFO-CD8a   |                        |                       |
|----------|-----------------------------|------------------------|-----------------------|
|          | <b>Tumor uptake (%ID/g)</b> | <b>Tumor-to-muscle</b> | <b>Tumor-to-blood</b> |
| + 0 µg   | 1.28 ± 0.17                 | 3.92 ± 0.68            | 10.74 ± 0.91          |
| + 5 µg   | 1.97 ± 0.09                 | 4.3 ± 0.42             | 12.81 ± 0.55          |
| + 10 µg  | 2.06 ± 0.08                 | 5.67 ± 1.13            | 14.1 ± 2.75           |
| + 30 µg  | 2.44 ± 0.59                 | 7.37 ± 0.68            | 14.69 ± 4.2           |
| + 100 µg | 2.45 ± 0.28                 | 5.3 ± 1.39             | 15.63 ± 0.89          |

Values are derived from gamma counting and presented as mean ± SEM. %ID/g: % injected dose per gram tissue.
